# Supplementary material
Source: Springer Nature journal article supplement (https://www.springermedizin.de/resource/supplementary/13019_2010_399_MOESM1_ESM.pdf/9638604)

## Reintervention-free Survival

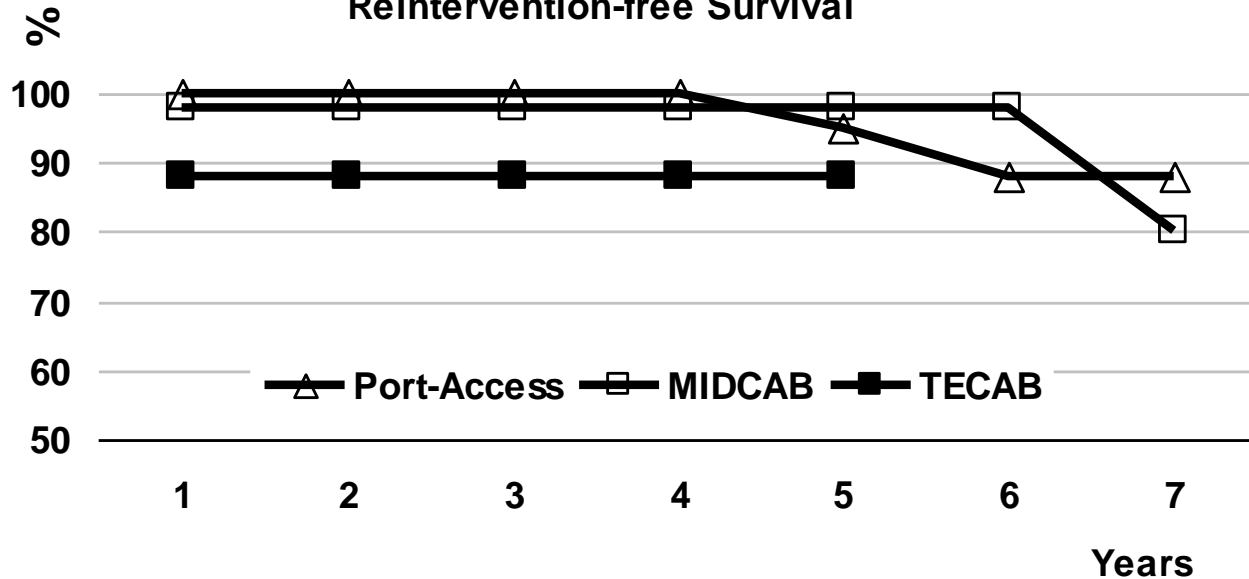

Supplement: MOESM1 [file 9638604]
